# Supplementary material for: Evaluating current practice and knowledge about antibiotic stewardship principles in paediatric tertiary hospitals to identify target areas for future teaching activities
Source: Springer Nature journal article supplement (doi:10.1007/s15010-022-01807-w), 2022-04-02
Supplement: MOESM2 [file 20278262]

## Supplementary Information 2

Journal name: Infection

### Evaluating current practice and knowledge about antibiotic stewardship principles in paediatric tertiary hospitals to identify target areas for future teaching activities

Laura Kolberg\*, Judith Buschbeck, Annabelle Wagner, Susanne Jonat, Gerhard Wolf, Jochen Peters, Uta Behrends, Maximilian Steinhauser, Johannes Huebner, Ulrich von Both

\*Corresponding author:

Laura Kolberg, MSc (ORCID: 0000-0002-3311-8254)

Department of Paediatric Infectious Diseases, Dr von Hauner Children's Hospital, Ludwig-Maximilians University, Lindwurmstr. 4, 80337 Munich, Germany, phone: +49 89 4400 53157, email: [laura.kolberg@med.uni-muenchen.de](mailto:laura.kolberg@med.uni-muenchen.de)

| Overview of all questions and answers of the 111 participating paediatricians                                                                      |         |     |     |      |
|----------------------------------------------------------------------------------------------------------------------------------------------------|---------|-----|-----|------|
|                                                                                                                                                    | Missing |     |     |      |
|                                                                                                                                                    | n       | %   | n   | %    |
| <b>Basic aspects and education of participant</b>                                                                                                  |         |     |     |      |
| 1. Where do you work as a paediatrician?                                                                                                           | 0       | 0   |     |      |
| Dr. von Hauner Children's Hospital                                                                                                                 |         |     | 66  | 59.5 |
| Other                                                                                                                                              |         |     | 45  | 40.5 |
| 2. What is your professional role?                                                                                                                 | 0       | 0   |     |      |
| junior doctor                                                                                                                                      |         |     | 47  |      |
| middle grade doctor                                                                                                                                |         |     | 34  |      |
| consultant                                                                                                                                         |         |     | 30  |      |
| 3. How often do you prescribe antibiotics per day?                                                                                                 | 0       | 0   |     |      |
| 0-1 x/day                                                                                                                                          |         |     | 65  | 58.6 |
| 2-4 x/ day                                                                                                                                         |         |     | 39  | 35.1 |
| >4 x/ day                                                                                                                                          |         |     | 7   | 6.3  |
| 4. Have you treated patients with infection caused by antibiotic-resistant pathogens (e.g. ESBL, MRSA, VRE, 3MRGN or 4 MRGN) within the last year? | 0       | 0   |     |      |
| Yes                                                                                                                                                |         |     | 96  | 86.5 |
| No                                                                                                                                                 |         |     | 12  | 10.8 |
| I don't know                                                                                                                                       |         |     | 3   | 2.7  |
| 5. Did you ever participate in any advanced training course in infectious diseases, microbiology or infection control / hospital epidemiology?     | 0       | 0   |     |      |
| Yes                                                                                                                                                |         |     | 5   | 4.5  |
| No                                                                                                                                                 |         |     | 106 | 95.5 |
| <b>Handling of antibiotics and bacterial resistance</b>                                                                                            |         |     |     |      |
| 6. What of the following options, do you think, contributes most to antimicrobial resistance?                                                      |         |     |     |      |
| 6.1                                                                                                                                                | 4       | 3.6 |     |      |
| <b>low dosing</b> (correct)                                                                                                                        |         |     | 101 | 91.0 |
| high dosing                                                                                                                                        |         |     | 6   | 5.4  |
| 6.2                                                                                                                                                | 4       | 3.6 |     |      |
| <b>long duration of therapy</b> (correct)                                                                                                          |         |     | 77  | 69.4 |
| short duration of therapy (< 7 days)                                                                                                               |         |     | 30  | 27.0 |

|                                                                                                                                                                                                                                                             |   |     |     |      |
|-------------------------------------------------------------------------------------------------------------------------------------------------------------------------------------------------------------------------------------------------------------|---|-----|-----|------|
| 6.3                                                                                                                                                                                                                                                         | 7 | 6.3 |     |      |
| <b>prescription of piperacillin (correct)</b>                                                                                                                                                                                                               |   |     | 62  | 55.9 |
| prescription of ampicillin                                                                                                                                                                                                                                  |   |     | 42  | 37.8 |
| 6.4                                                                                                                                                                                                                                                         | 7 | 6.3 |     |      |
| <b>prescription of azithromycin (correct)</b>                                                                                                                                                                                                               |   |     | 63  | 56.8 |
| prescription of clarithromycin                                                                                                                                                                                                                              |   |     | 41  | 36.9 |
| 7. What is the current prevalence of macrolide resistance in the group A streptococcus (GAS) population according to national / regional data?                                                                                                              | 1 | 0.9 |     |      |
| <b>correct (&gt; 10 %)</b>                                                                                                                                                                                                                                  |   |     | 29  | 26.1 |
| incorrect                                                                                                                                                                                                                                                   |   |     | 81  | 73.0 |
| 8. What is the prevalence of penicillin resistance in the <i>Streptococcus pneumoniae</i> population according to national / regional data?                                                                                                                 | 0 | 0   |     |      |
| <b>correct (&lt; 1 %)</b>                                                                                                                                                                                                                                   |   |     | 9   | 8.1  |
| incorrect                                                                                                                                                                                                                                                   |   |     | 102 | 91.9 |
| 9. What, do you think, is the community carrier rate of ESBL?                                                                                                                                                                                               | 0 | 0   |     |      |
| <b>correct (5-10%)</b>                                                                                                                                                                                                                                      |   |     | 58  | 52.3 |
| incorrect                                                                                                                                                                                                                                                   |   |     | 53  | 47.7 |
| 10. Which of the following antibiotics, do you think, contributes most to an increased risk for <i>Clostridium difficile</i> infection?                                                                                                                     | 0 | 0   |     |      |
| <b>correct (Cefotaxime)</b>                                                                                                                                                                                                                                 |   |     | 57  | 51.4 |
| incorrect                                                                                                                                                                                                                                                   |   |     | 54  | 48.6 |
| <b>Microbial aspects of infectious disease</b>                                                                                                                                                                                                              |   |     |     |      |
| 11. Smaller minimal inhibition concentration (MIC) values are...                                                                                                                                                                                            | 0 | 0   |     |      |
| <b>correct (better)</b>                                                                                                                                                                                                                                     |   |     | 92  | 82.9 |
| incorrect                                                                                                                                                                                                                                                   |   |     | 19  | 17.1 |
| 12. <i>Haemophilus influenzae</i> is...                                                                                                                                                                                                                     | 0 | 0   |     |      |
| <b>correct (gram-negative)</b>                                                                                                                                                                                                                              |   |     | 83  | 74.8 |
| incorrect                                                                                                                                                                                                                                                   |   |     | 28  | 25.2 |
| 13. After what incubation time can a result be considered "negative" in the vast majority of cases (>90%) if there is no growth in the blood culture?                                                                                                       | 1 | 0.9 |     |      |
| <b>correct (2-3 days)</b>                                                                                                                                                                                                                                   |   |     | 43  | 38.7 |
| incorrect                                                                                                                                                                                                                                                   |   |     | 67  | 60.4 |
| 14. You get a call from the bacteriology lab informing you that <i>P. aeruginosa</i> <b>3MRGN</b> has grown in your patient's blood culture. Which of the following antibiotic classes does not play a role in this resistance assessment and nomenclature? | 2 | 1.8 |     |      |
| <b>correct (Aminoglykoside)</b>                                                                                                                                                                                                                             |   |     | 40  | 36.0 |
| Incorrect                                                                                                                                                                                                                                                   |   |     | 69  | 62.2 |
| <b>Hospital hygiene</b>                                                                                                                                                                                                                                     |   |     |     |      |
| 15. What is the most important infection control measure?                                                                                                                                                                                                   | 3 | 2.7 |     |      |
| <b>correct (strict adherence to hand hygiene)</b>                                                                                                                                                                                                           |   |     | 104 | 93.7 |
| incorrect                                                                                                                                                                                                                                                   |   |     | 4   | 3.6  |
| 16. An inpatient with evidence of MRSA in a nasopharyngeal swab should be isolated according to which isolation scheme?                                                                                                                                     | 2 | 1.8 |     |      |
| <b>correct (Basic measures + droplet isolation)</b>                                                                                                                                                                                                         |   |     | 43  | 38.7 |
| incorrect                                                                                                                                                                                                                                                   |   |     | 66  | 59.5 |
| 17. An inpatient with pulmonary tuberculosis should be isolated according to which isolation scheme?                                                                                                                                                        | 3 | 2.7 |     |      |
| <b>correct (Basic measures + aerogenic isolation)</b>                                                                                                                                                                                                       |   |     | 82  | 72.9 |
| incorrect                                                                                                                                                                                                                                                   |   |     | 26  | 23.4 |

| <b>Antibiotic stewardship and treatment standards</b>                                                                                                                                                                                                                                                                                                                                                                                       |    |      |    |      |
|---------------------------------------------------------------------------------------------------------------------------------------------------------------------------------------------------------------------------------------------------------------------------------------------------------------------------------------------------------------------------------------------------------------------------------------------|----|------|----|------|
| 18. Which antibiotics require therapeutic drug monitoring (TDM)? ( <i>More than 1 answer is possible</i> )                                                                                                                                                                                                                                                                                                                                  | 4  | 3.6  |    |      |
| correct ( <b>Vancomycin and amikacin</b> )                                                                                                                                                                                                                                                                                                                                                                                                  |    |      | 37 | 33.3 |
| incorrect                                                                                                                                                                                                                                                                                                                                                                                                                                   |    |      | 70 | 63.1 |
| 19. You are asked to prescribe perioperative antibiotic prophylaxis for a healthy teenager who is going to have an elective neurosurgical procedure on the spine and spinal cord. Which antibiotic would you prescribe in this case?                                                                                                                                                                                                        | 4  | 3.6  |    |      |
| correct ( <b>1st or 2nd generation Cephalosporine (e.g. Cefazolin or Cefuroxime) IV</b> )                                                                                                                                                                                                                                                                                                                                                   |    |      | 62 | 55.9 |
| incorrect                                                                                                                                                                                                                                                                                                                                                                                                                                   |    |      | 45 | 40.5 |
| 20. If you recommend perioperative prophylaxis (n=106), for how long?                                                                                                                                                                                                                                                                                                                                                                       | 5  | 4.5  |    |      |
| correct ( <b>Preoperative single dose</b> )                                                                                                                                                                                                                                                                                                                                                                                                 |    |      | 36 | 38.2 |
| incorrect                                                                                                                                                                                                                                                                                                                                                                                                                                   |    |      | 64 | 61.8 |
| 21. A 3-year-old child with all STIKO-recommended vaccinations gets admitted. The child presents with cough, fever and chest pain for about 4 days. The temperature is 38.5 °C, respiratory rate 30/min, heart rate 90/min and oxygen saturation in air is 98%. The chest X-ray shows an infiltrate of moderate size in the right middle lobe. Which antibiotic with the lowest possible activity spectrum would be indicated in this case? | 7  | 6.3  |    |      |
| correct ( <b>Ampicillin or penicillin IV</b> )                                                                                                                                                                                                                                                                                                                                                                                              |    |      | 91 | 82.0 |
| incorrect                                                                                                                                                                                                                                                                                                                                                                                                                                   |    |      | 13 | 11.7 |
| 22. The child mentioned above shows clinical improvement (fever resolution after 48 hours and good appetite) and blood cultures are negative. What would you prescribe to continue oral therapy on an outpatient basis?                                                                                                                                                                                                                     | 6  | 5.4  |    |      |
| correct ( <b>Amoxicillin PO</b> )                                                                                                                                                                                                                                                                                                                                                                                                           |    |      | 80 | 72.1 |
| incorrect                                                                                                                                                                                                                                                                                                                                                                                                                                   |    |      | 5  | 22.5 |
| 23. What is the recommended therapy duration in this case of above mentioned uncomplicated bacterial pneumonia in childhood?                                                                                                                                                                                                                                                                                                                | 7  | 6.3  |    |      |
| correct ( <b>7 days</b> )                                                                                                                                                                                                                                                                                                                                                                                                                   |    |      | 77 | 69.4 |
| incorrect                                                                                                                                                                                                                                                                                                                                                                                                                                   |    |      | 27 | 24.3 |
| 24. You are asked to prescribe antibiotic therapy for a previously healthy 11-year-old girl who is now on her way to surgery with signs of clinical appendicitis. Which of the following antibiotics would be your first choice?                                                                                                                                                                                                            | 10 | 9    |    |      |
| correct ( <b>Amoxicillin and clavulanic acid IV</b> )                                                                                                                                                                                                                                                                                                                                                                                       |    |      | 18 | 16.2 |
| incorrect                                                                                                                                                                                                                                                                                                                                                                                                                                   |    |      | 83 | 74.8 |
| <b>Structure of work environment</b>                                                                                                                                                                                                                                                                                                                                                                                                        |    |      |    |      |
| 25. When deciding on antibiotic therapy for a patient, who or what do you turn to first if you have questions?                                                                                                                                                                                                                                                                                                                              | 16 | 14.4 |    |      |
| junior doctor colleagues on ward or Consultant                                                                                                                                                                                                                                                                                                                                                                                              |    |      | 23 | 20.7 |
| Guidelines (e.g. Hauner AntibiotiKarte, Sanford Guide, Red Book, Blue Book, DGPI manual)                                                                                                                                                                                                                                                                                                                                                    |    |      | 70 | 63.1 |
| other source                                                                                                                                                                                                                                                                                                                                                                                                                                |    |      | 2  | 1.8  |
| 26. When prescribing antibiotics, which type of bacterial resistance data do you consider most relevant?                                                                                                                                                                                                                                                                                                                                    | 11 | 9.9  |    |      |
| none                                                                                                                                                                                                                                                                                                                                                                                                                                        |    |      | 2  | 1.8  |
| local resistance data                                                                                                                                                                                                                                                                                                                                                                                                                       |    |      | 74 | 66.7 |
| national resistance data                                                                                                                                                                                                                                                                                                                                                                                                                    |    |      | 19 | 17.1 |
| global resistance reports                                                                                                                                                                                                                                                                                                                                                                                                                   |    |      | 4  | 3.6  |
| other                                                                                                                                                                                                                                                                                                                                                                                                                                       |    |      | 1  | 0.9  |

|                                                                                                                                                           |    |      |    |      |
|-----------------------------------------------------------------------------------------------------------------------------------------------------------|----|------|----|------|
| 27. Which of the following do you consider the <b>most difficult</b> measure to implement to improve antibiotic therapy <i>in your work environment</i> ? | 17 | 15.3 |    |      |
| De-escalation from broad-spectrum empirical therapy to targeted treatment following receipt of pathogen differentiation and antibiogram                   |    |      | 8  | 7.2  |
| Rapid conversion from IV to PO antibiotic therapy                                                                                                         |    |      | 7  | 6.3  |
| Reduction of therapy duration                                                                                                                             |    |      | 15 | 13.5 |
| Stop antibiotic therapy in absence of documented infection                                                                                                |    |      | 23 | 20.7 |
| Increased use of narrow-spectrum antibiotics instead of broad-spectrum antibiotics                                                                        |    |      | 41 | 36.9 |
| 28. Which of the following do you consider the <b>easiest</b> measure to implement to improve antibiotic therapy <i>in your work environment</i> ?        | 15 | 13.5 |    |      |
| De-escalation from broad-spectrum empirical therapy to targeted treatment following receipt of pathogen differentiation and antibiogram                   |    |      | 48 | 43.2 |
| Rapid conversion from IV to P antibiotic therapy                                                                                                          |    |      | 21 | 18.9 |
| Reduction of therapy duration                                                                                                                             |    |      | 8  | 7.2  |
| Stop antibiotic therapy in absence of documented infection                                                                                                |    |      | 18 | 16.2 |
| Increased use of narrow-spectrum antibiotics instead of broad-spectrum antibiotics                                                                        |    |      | 1  | 0.9  |
